1 **Unravelling the effect of a potentiating anti-Factor H antibody on atypical**  
2 **hemolytic uremic syndrome associated factor H variants**

3 Gillian Dekkers\*, Mieke Brouwer\*, Jorn Jeremiasse\*, Angela Kamp\*, Robyn M. Biggs<sup>†</sup>, Gerard van  
4 Mierlo\*, Scott Lauder<sup>†</sup>, Suresh Katti<sup>†</sup>, Taco W. Kuijpers<sup>‡, §</sup>, Theo Rispens<sup>\*, ¶</sup> and Ilse Jongerius<sup>\*, ‡, ¶</sup>

5 \* Department of Immunopathology, Sanquin Research, Amsterdam, The Netherlands, and  
6 Landsteiner Laboratory, Amsterdam UMC, University of Amsterdam; The Netherlands

7 <sup>†</sup> Gemini Therapeutics Inc., Cambridge, MA, USA

8 <sup>‡</sup> Department of Pediatric Immunology, Rheumatology & Infectious Diseases, Emma children's  
9 hospital, Amsterdam UMC, Amsterdam; The Netherlands

10 <sup>§</sup> Department of Blood Cell Research, Sanquin Research, Amsterdam, The Netherlands, and  
11 Landsteiner Laboratory, Amsterdam UMC, University of Amsterdam; The Netherlands

12 <sup>¶</sup> Authors contributed equally

13 **Corresponding Author:** Ilse Jongerius  
14 [i.jongerius@sanquin.nl](mailto:i.jongerius@sanquin.nl)  
15 Plesmanlaan 125  
16 1066 CX Amsterdam  
17 The Netherlands  
18 Tel: 0031 20512 3158  
19 Fax: 0031 20512 3474

20 **Financial support:**

21 G.D. and M.B. are paid by a research grant provided by Gemini therapeutics.

22 **Conflict of interest:**

23 R.M.B., S.L. and S.K. are employees of Gemini Therapeutics LTD. Which provided partial financial  
24 support for this study.

25 T.W.K. is co-inventor of a patent (PCT/NL2015/050584) describing the potentiation of FH with mAbs  
26 and therapeutic uses thereof, which is licensed to Gemini Therapeutics.

27 All other authors declare that they have no conflicts of interest relevant to the submitted  
28 manuscript.

29 **Keywords:**

30 Complement factor H, atypical hemolytic uremic syndrome, therapeutic antibody

- 31 **Overview:**
- 32 Word count abstract: 250
- 33 Word count introduction/results/discussion: 4672
- 34 Figure / Table count: 5
- 35 Reference count: 39

36

37 **Abstract**

38 The complement system plays an important role in our innate immune system. Complement  
39 activation results in clearance of pathogens, immune complex and apoptotic cells. The host is  
40 protected from complement-mediated damage by several complement regulators. Factor H (FH) is  
41 the most important fluid-phase regulator of the alternative pathway of the complement system.  
42 Heterozygous mutations in FH are associated with complement-related diseases such as atypical  
43 hemolytic uremic syndrome (aHUS) and age-related macular degeneration.

44 We recently described an agonistic anti-FH monoclonal antibody that can potentiate the regulatory  
45 function of FH. This antibody could serve as a potential new drug for aHUS patients and alternative to  
46 C5 blockade by Eculizumab. However, it is unclear whether this antibody can potentiate FH mutant  
47 variants in addition to wild type FH. Here, the functionality and potential of the agonistic antibody in  
48 the context of pathogenic aHUS-related FH mutant proteins was investigated. The binding affinity of  
49 recombinant WT FH, and the FH variants, W1183L, V1197A, R1210C, and G1194D to C3b was  
50 increased upon addition of the potentiating antibody and similarly, the decay accelerating activity of  
51 all mutants is increased. The potentiating anti-FH antibody is able to restore the surface regulatory  
52 function of most of the tested FH mutants to WT FH levels. In conclusion, our potentiating anti-FH is  
53 broadly active and able to enhance both WT FH function as well as most aHUS-associated FH variants  
54 tested in this study.

55

## 56 Introduction

57 The complement system plays an important role in our immune system ensuring pathogens, immune  
58 complexes and dying cells are efficiently cleared from circulation. Activation of the complement  
59 system can occur via three pathways: the classical (CP), lectin (LP) and alternative pathway (AP).  
60 Activation of any of these pathways leads to the cleavage of the central complement component C3,  
61 into C3a and C3b. C3a is an anaphylatoxin and C3b attaches covalently to surfaces, creating an  
62 opsonization signal that allows recognition and clearance by the immune system. In addition, C3b  
63 can lead to the formation of C5 convertases that cleave C5 into C5a and C5b, which is necessary to  
64 form the membrane attack complex (MAC), resulting in lysis of the target (1–3).

65 The AP can be initiated via the spontaneous hydrolyzation of C3 (tick-over) in the fluid phase, forming  
66 C3(H<sub>2</sub>O) and serves to amplify the effects of activated CP and the LP. The AP amplification loop starts  
67 with the binding of Factor B (FB) to C3b and is cleaved by Factor D (FD), forming the AP C3 convertase  
68 C3bBb, which can cleave another C3. Binding of an additional C3b molecule to the C3bBb forms the  
69 AP C5 convertase (4, 5). To prevent unwanted damage to the body's own cells by this amplification  
70 loop, complement is tightly regulated by fluid-phase and membrane bound complement regulators  
71 (1, 2, 6). Factor H (FH) is the main regulator of the AP (7).

72 FH regulates C3 convertase activity both in fluid phase as well as on the cellular surface. FH binds to  
73 C3b and mammalian cellular surfaces by interaction with host specific glycosaminoglycans (GAGs) or  
74 sialic acid containing glycans on the cellular membrane (8). This interaction results in decay of the AP  
75 convertase C3bBb. Furthermore, FH together with factor I (FI) degrades C3b to iC3b and renders it  
76 proteolytically inactive towards formation of the convertases (9). FH is composed of 20 complement  
77 control protein (CCP) domains and can be further divided into regions that specifically interact with  
78 sialic acids and GAGs on the surface of human cells, C3b or both (10, 11). The N-terminal region,  
79 composed of CCP domains 1 to 4, is involved in binding to C3b and responsible for the decay  
80 accelerating activity (DAA) and co-factor activity of FH. There are additional C3b binding sites within  
81 the regions encompassed by CCPs 7 to 15 and 19 to 20, of which the latter interacts with C3b, iC3b  
82 and C3d. The FH CCPs 7, 20 and the 15-19 region are involved in heparin and polyanion binding, and  
83 the C-terminal CCP-20 is involved in sialic acid binding. The binding of FH CCPs 19 and 20 to both C3b  
84 and polyanions is crucial for the host recognition (7, 11, 12).

85 Atypical hemolytic uremic syndrome (aHUS) is a complement-mediated disease, characterized by  
86 hemolytic anemia, thrombocytopenia and complement depositions in the kidney in particular,  
87 resulting in acute renal failure (13). Many aHUS patients carry genetic mutations in a complement  
88 protein gene, where 25-30% of the cases are observed to have FH gene mutations and ~5% of aHUS

89 cases are observed to develop blocking autoantibodies against FH (13). The aHUS patients carrying a  
90 FH mutation are heterozygously affected (14, 15). Whether both WT and mutant variant of FH are  
91 equally expressed and thus present in the patient's serum is largely unknown. Interestingly, the aHUS  
92 mutations often occur within the two most C-terminal domains of FH, which are the key regions for  
93 FH's interactions with both C3b and the cellular surface (16, 17). This association between aHUS and  
94 mutations in FH CCPs 19 and 20 highlight s the importance of these regions for maintenance of  
95 complement regulation on host-cell surfaces.

96 We have generated an anti-FH agonistic antibody that is able to potentiate the effector functions of  
97 FH on human cells without affecting the bactericidal activity of the complement system (18). This  
98 potentiation is characterized by an improved affinity of FH for C3b and a reduced  $IC_{50}$  of C3b  
99 deposition and complement mediated lysis of sheep erythrocytes. The agonistic anti-FH was able to  
100 restore complement regulation in aHUS patient sera (18), but it remained unclear whether the  
101 observed effect was due to enhancement of both WT and mutant FH or if the anti-FH agonistic  
102 antibody potentiates only the WT FH in these heterozygous patient's sera. Here, we have studied the  
103 effect of our potentiating anti-FH antibody on four naturally-occurring FH mutants that are  
104 associated with aHUS. Three of the four tested mutants were functionally restored to the normal  
105 level of regulation in the presence of the potentiating anti-FH. This demonstrates the agonistic  
106 activity of this antibody on WT and aHUS associated FH mutant proteins and provide *in vitro* proof of  
107 concept evidence for this agonistic antibody to be developed for the therapeutic treatment of aHUS  
108 caused by heterozygous mutations in FH.

109

## 110 **Material and Methods**

### 111 **Antibodies, proteins and reagents**

112 Recombinant human C-terminal HIS-tagged FH wild type (WT), or with mutations in CCP20; W1183L,  
113 V1197A, R1210C, G1194D, were provided by Gemini Therapeutics. The recombinantly produced FH  
114 mutants were over 95% pure as shown by SDS page (**Supplemental Fig. 1**). The recombinant  
115 expression of FH did not negatively affect the affinity of the potentiating anti-FH antibody (chimeric  
116 IgG4) to FH and was slightly better compared to the affinity of our antibody to plasma derived FH  
117 (pdFH) (18) and all recombinant FH had similar affinities ( $K_D \approx < 1$  nM, data not shown) for the  
118 potentiating antibody as determined by surface plasmon resonance (SPR).

119 pdFH, FB, FD and C3b were purchased from Complement Technology. In addition, for the C3b binding  
120 experiment in SPR, pdFH was obtained by in house isolation as previously described (19).

121 Chimeric versions (human IgG4) of anti-FH.07 (18) and anti-FH.07.1 have been provided by Gemini  
122 Therapeutics. Compared to previously published anti-FH.07 this paper makes use of anti-FH.07.1,  
123 further referred to as the "potentiating anti-FH". This antibody has a similar binding epitope and  
124 comparable function, as shown by competition ELISA and C3b deposition ELISA, performed as  
125 described previously (18) (**supplemental Fig. 2**).

126 Mouse-anti-human monoclonal antibodies anti-C3-19 (20), anti-FH.16 (directed against FH CCP-16,  
127 non-competing control), anti-FH.09 (directed against FH CCP-6, inhibiting control) (18), anti-IL6-8 (IgG  
128 control) (18), anti-CD46.3 and anti-CD55.1 (21) were produced in house and labeled as indicated.  
129 Proteins or antibodies were biotinylated according to the manufacturer's instructions using EZ-Link  
130 Sulfo- NHS-LC-Biotin, No-Weigh Format (Thermo Scientific). Fluorescent labeling of antibodies was  
131 done with DyLight 488 or DyLight 647 Amine-Reactive Dye (Thermo Scientific) according to  
132 manufacturer's instructions. Fab' fragments of the monoclonal antibodies have been provided by  
133 Gemini Therapeutics or are generated by pepsin cleavage of in house produced antibodies as  
134 described previously (18).

135 Normal pooled serum (NPS) was obtained from > 30 healthy donors with informed, written consent,  
136 in accordance with Dutch regulations. This study was approved by the Sanquin Ethical advisory board  
137 in accordance with the Declaration of Helsinki. Serum was obtained by allowing blood to coagulate  
138 for 1 h at room temperature (RT) and collecting the supernatant after centrifugation at  $950 \times g$  for 10  
139 min, pooled serum was aliquoted and stored at  $-80^\circ\text{C}$ . FH depleted serum was purchased from  
140 Complement Technology. Eculizumab (Alexion Pharmaceutical) was obtained by collecting surplus  
141 from used Soliris injection bottles. Sheep erythrocytes (ES) were from Hätunalab. High-performance

142 enzyme-linked immunosorbent assay (ELISA) buffer (HPE), streptavidin conjugated with poly-  
143 horseradish peroxidase (strep-poly-HRP), were from Sanquin Reagents. Anti-CD59 (MEM-43, FITC)  
144 was ordered from Thermo Scientific.

#### 145 **ELISA**

146 Unless stated otherwise, all ELISA incubation steps were performed for 1 hour at RT on a shaker.  
147 After each incubation, plates were washed 5 times with PBS containing 0.02% Tween-20 (PBS;  
148 Sanquin Diagnostics) using an ELISA washer (Biotek, 405 LSRS). All ELISAs were developed with 100  $\mu$ L  
149 substrate solution per well containing 0.11 M sodium acetate (Merck), 0.1 mg/mL 3,5,3',5'-  
150 tetramethylbenzidine (TMB, Merck) and 0.003% (v/v) H<sub>2</sub>O<sub>2</sub> (Merck) diluted in milliQ (Merck).  
151 Reactions were stopped with 100  $\mu$ L 0.2M H<sub>2</sub>SO<sub>4</sub> (Merck). Time that reactions were incubated varies  
152 per ELISA and are mentioned below. Absorbance was measured at OD<sub>450nm</sub> using a Synergy 2 Multi-  
153 Mode plate reader (BioTek Instruments) and corrected for the absorbance at OD<sub>540nm</sub>. All ELISA  
154 steps were performed with a final volume of 100  $\mu$ L per well.

#### 155 **C3b deposition on LPS**

156 C3b deposition assay with NPS was performed as described previously (18). C3b deposition assay  
157 with FH depleted serum was performed as followed. Polysorp 96-wells microtiter plates (Nunc) were  
158 coated with Salmonella typhosa LPS (40  $\mu$ g/mL, Sigma-Aldrich) in PBS, O/N at RT. After washing NPS  
159 or FH depleted serum was incubated in Veronal buffer (VB; 3 mM barbital, 1.8 mM sodium barbital,  
160 145 mM NaCl, pH 7.4) containing 0.05% (w/v) gelatin, 5 mM MgCl<sub>2</sub>, 10 mM EGTA and 0.1% (w/v)  
161 Tween-20 in the presence or absence of FHs and/or anti-FH potentiating mAb at indicated  
162 concentrations. C3b deposition was detected with biotinylated mAb anti-C3.19 (0.55  $\mu$ g/mL in HPE)  
163 followed by incubation with 0.0001% (v/v) strep-poly-HRP in HPE for 30 minutes. The ELISA was  
164 further developed as described above.

#### 165 **SDS page, coomassie**

166 To analyze the recombinant FH variants, **0.3  $\mu$ g** of sample was denaturated in 4x LDS sample buffer  
167 (Invitrogen) and incubated for 10 min at 70°C. Samples were loaded on 4-12% bis-tris gel (Life Tech).  
168 Gel was run at 200 V for ~55 min in MOPS buffer (Novex). Gel was stained for 20 minutes using  
169 instant blue stain (Expedeon) and unstained in MilliQ for approximately 16 hours. Gel was  
170 photographed using a Chemidoc (Bio-rad).

#### 171 **Surface Plasmon Resonance (SPR)**

172 All surface plasmon resonance (SPR) experiments were performed using a Biacore T200 (GE  
173 Healthcare) with either a research grade Series S Sensor Chip Protein G (GE healthcare) or Series S  
174 Sensor Chip CM5 (GE healthcare). Unless stated otherwise, SPR experiments were performed at 25°C

175 using a flow rate of 15  $\mu\text{L}/\text{min}$  and in phosphate buffered saline (PBS, Fresenius Kabi), pH 7.4 with  
176 0.1% (w/v) Tween-20 (Merck) (PBS-T). Data were collected at a rate of 10 Hz and all SPR data were  
177 analyzed using Scrubber (v20c, Biologic).

#### 178 **Antibody affinity for recombinant FH in SPR**

179 For the assessment of affinity of the potentiating antibody for FH mutants, at the beginning of each  
180 cycle, the potentiating antibody was captured on a Series S Sensor Chip Protein G at a concentration  
181 of 1  $\mu\text{g}/\text{mL}$  during 60 seconds, corresponding with a  $\sim 200$  response units (RU) signal increase, leaving  
182 a second flow cell blank as reference. After a stabilization period of 300 seconds, a titration of the FH  
183 of interest (155 kDa) was injected, in random order in a two-fold dilution range starting at 500 or 250  
184 nM. The complex was allowed to associate for 600 seconds and dissociate for 1500 seconds. After  
185 each FH injection, the Protein G chip was regenerated for 30 seconds with 100 mM Glycin-HCl  
186 (Merck) pH 1.5 at 30  $\mu\text{L}/\text{min}$  and the process was repeated starting a new cycle with the capture of  
187 the potentiating antibody. Affinity constants were determined using kinetic modelling.

#### 188 **Coupling C3b sensor chip for SPR**

189 For the assessment of the affinity of FH to C3b or the decay accelerating activity of FH in the  
190 presence of various antibodies (Fab' fragments), purified C3b was immobilized via amine-coupling on  
191 a series S CM5 Sensor Chip using standard methods. In short, flow channels were activated for 7  
192 minutes with a 1-to-1 mixture of 0.1 M N-hydroxysuccinimide (GE healthcare) and 0.1 M 3-(N,N-  
193 dimethylamino) propyl-N-ethylcarbodiimide (GE healthcare) at a flow rate of 5  $\mu\text{L}/\text{min}$ . The  
194 reference flow channel was blank immobilized, the other was immobilized with C3b, diluted in 10  
195 mM sodium acetate (BioRad), pH 5.0, with target immobilization response of 2000 RU. When desired  
196 RU signals were reached, the surfaces were blocked with a 7 min. injection of 1 M ethanolamide, pH  
197 8.0 (GE healthcare) to finish immobilization.

#### 198 **Affinity of FH to C3b in SPR**

199 To assess binding of FH to C3b, FH was injected in two-fold dilution range, starting at 10 $\mu\text{M}$ , 5 $\mu\text{M}$  (in  
200 house obtained pdFH) or 625 nM (recombinant) FH, in random order, with a flow rate of 10  $\mu\text{L}/\text{min}$ ,  
201 at 37° C, over both reference and C3b coupled flow channels of the C3b coupled sensor chip  
202 described above and allowed to associate and dissociate for 60 seconds each. After each cycle the  
203 flow channels were regenerated for 10 seconds with 2 M NaCl (Merck) at 10  $\mu\text{L}/\text{min}$ . To assess the  
204 effect of various potentiating antibodies on the binding affinity of FH to C3b, FH was similarly titrated  
205 in buffer containing a surplus of potentiating antibody Fab' fragments; either 10  $\mu\text{M}$  or 1.25  $\mu\text{M}$  (2  
206 times highest FH concentration in respective experiment). The obtained signals were corrected for



207 the MW of FH (155 kDa) and the FH-anti-FH Fab' fragment complex (205 kDa). Affinity constant ( $K_D$ )  
208 was determined by plotting the affinity curve at equilibrium of binding.

#### 209 **Decay acceleration activity (DAA) assay in SPR**

210 To assess DAA of FH in the absence or presence of one of the various potentiating antibodies, a C3b  
211 coupled sensor chip as described above was used. Running buffer in this experiment was 10 mM  
212 HEPES with 150 mM NaCl, 1 mM  $MgCl_2$  and 0.005% (w/v) Tween-20, pH 7.4. Regeneration buffer was  
213 10 mM HEPES with 150 mM NaCl, 3.4 mM Ethylenediaminetetraacetic acid (EDTA) and 0.005% (w/v)  
214 Tween-20, pH 7.4. To form the C3 convertase C3bBb, FB and FD were simultaneously injected at a  
215 concentration of respectively 600 nM and 100 nM for 180 seconds, corresponding with a ~250 RU  
216 increase. After a stabilization period of 120 seconds (natural decay of the convertase), FH (50 or 12.5  
217 nM) with or without the potentiating antibodies (100 or 200 nM) Fab' fragments were injected for  
218 180 seconds. Finally, buffer was flowed over for another 300 seconds. After each cycle the flow  
219 channels were regenerated for 30 seconds with regeneration buffer at 30  $\mu$ L/min. Runs were  
220 performed without or with FB and FD capture, respectively the "buffer" or "FB and FD" conditions.  
221 To obtain the final superimposed DAA signal, the signals of the buffer conditions were subtracted  
222 from the corresponding FB and FD conditions.

#### 223 **Hemolytic assay**

224 Hemolytic assay was performed with some adjustments for the use of FH depleted serum. Each  
225 component described below was 25% (v/v) of total assay volume. In a U-shaped assay plate  
226 containing a 2-mm diameter glass bead (merck), FHs were diluted in VB + 0.05 % gelatin (Merck)  
227 (VBG) with or without an excess of potentiating anti-FH and titrated in two-fold. Sheep erythrocytes  
228 (SE) were washed with PBS and resuspended in VB + 5.8% sucrose (VBS), to contain  $1.05 \times 10^8$   
229 cells/mL in final assay concentration. NPS and FH depleted serum were diluted in VBG + 0.1 mM  
230 EDTA, to be 10% (v/v) in final assay conditions. To activate the alternative pathway, VBG + 5 mM  
231  $MgCl_2$  + 10 mM EGTA in final concentration was added to the wells. VBG with 10 mM EDTA was used  
232 as blank. Samples were incubated at 37°C for 75 minutes while shaking at 450 RPM (Eppendorf  
233 thermomixer). Lysis was stopped by adding 100  $\mu$ L VBG followed by centrifugation (2.5 minutes,  
234 1800 RPM/471 RCF, 7°C). Hemolysis was measured as absorbance of the supernatants at 412 nm,  
235 corrected for background absorbance measured at 690 nm, and expressed as percentage of the  
236 100% lysis control (ES incubated with 0.85‰ (w/v) Saponin). Graphs were fitted using a nonlinear fit,  
237 [inhibitor] versus response with four parameters.

238 **C3 deposition on HAP-1 cells**

239 HAP-1 cells (22) (Haplogen Genomics, Wien, Austria) deficient for CD46, CD55, and CD59 (deficient  
240 HAP-1 cells) (21) were cultured in Iscove's Modified Dulbecco's Medium (IMDM; Lonza)  
241 supplemented with 10% (v/v) fetal calf serum (FCS; Sigma-Aldrich), 100 U/mL penicillin (Invitrogen)  
242 and 100 µg/mL streptavidin (IMDM++; Invitrogen) at 37 °C and 5% CO<sub>2</sub>. Cells were washed with PBS  
243 and detached using Accutase (Sigma-Aldrich). Surface expression was checked by staining with anti-  
244 CD46-3-DyLight 488 (FITC), anti-CD55-1-DyLight 647 (APC), and anti-CD59-FITC conjugated antibodies  
245 and analysis using flow cytometry.

246 Complement activation and detection was performed as followed. In a U-shaped assay plate  
247 containing a 2-mm diameter glass bead,  $7 \times 10^4$  HAP-1 cells were incubated for 1 h at 37 °C while  
248 shaking at 350 RPM with 25% (v/v) NPS or FH depleted serum diluted in VBG supplemented with 10  
249 mM MgCl<sub>2</sub> and 20 mM EGTA (VBG<sup>MgEGTA</sup>) in the presence of equimolar (20 µg/mL) blocking anti-C5  
250 (Eculizumab) to prevent lysis. FHs and/or potentiating anti-FH were added to the cells prior to  
251 addition of the serum. After incubation, deficient HAP-1 cells were washed with PBS supplemented  
252 with 0.5% (w/v) bovine serum albumin (BSA, Sigma-Aldrich) before staining in PBS containing 0.1%  
253 BSA. C3 deposition was detected by incubation of the HAP-1 cells with 1 µg/mL DyLight 488-  
254 conjugated or DyLight 647-conjugated anti-C3-19 for 30 min at room temperature. After incubation  
255 cells were washed 3 times with PBS containing 0.5% BSA and subsequently fixed 1% (w/v)  
256 paraformaldehyde (PFA, Merck Millipore) in PBS. LSR Canto II flow cytometer (BD Biosciences) was  
257 used for measuring and data analysis was performed using FlowJo software V10 (Treestar, Ashland,  
258 OR). Gating strategies are shown in **Supplemental Fig. 3**.

259 **Statistical analysis**

260 Analysis and statistical tests were performed using GraphPad Prism version 8.0.2 (GraphPad  
261 Software).

## 262 **Results**

### 263 **Potential of affinity of FH for C3b by potentiating anti-FH**

264 We previously showed that our potentiating antibody can restore complement regulation in aHUS  
265 patient samples (18). To investigate whether our antibody can potentiate both WT as well as mutant  
266 FH we used recombinant variants of FH, namely wild type (WT) and aHUS-associated mutants  
267 W1183L, V1197A, R1210, and G1194D (> 95% pure, **Supplemental Fig 1**). First, we studied the  
268 potentiating effect of anti-FH.07.1 on FH binding to C3b. **Fig. 1** shows that the addition of anti-  
269 FH.07.1 Fab' fragments to pdFH increases the affinity for C3b by ~3-fold compared to pdFH injection  
270 alone, with  $K_D$ s of 1.9 and 6.0  $\mu$ M respectively (**Fig. 1A, 1B**). We observed a clear titration dependent  
271 increase in binding of pdFH to C3b, confirming previous study (18). All tested full length recombinant  
272 FH mutants showed slightly (< 2-fold) weaker binding to C3b compared to recombinant WT FH.  
273 Addition of the potentiating anti-FH Fab' fragments increased affinity to C3b of all tested FH mutants  
274 by 1.8 - 2.4 fold (**Fig. 1C, 1D, Table I**). In conclusion, these experiments show that the studied  
275 mutations in FH only slightly impair the binding to C3b and that all tested mutants are enhanced in  
276 their affinity to C3b by anti-FH.07.1.

### 277 **All FH mutants show decay acceleration of AP convertase and are potentiated by potentiating anti-** 278 **FH**

279 Next, we studied the potential of the FH mutants to perform DAA of the AP convertase utilizing a SPR  
280 based assay (23). In this assay, we constructed the AP convertase C3bBb on the SPR chip by coupling  
281 C3b to the chip followed by incubation with FB and FD after which the AP convertases are formed  
282 (**Fig. 2A**, phase I). The AP convertases will naturally decay (**Fig. 2A**, phase II). As expected, this decay  
283 is increased upon injection of FH (**Fig. 2A**, phase III). With addition of anti-FH.07.1 Fab' fragments  
284 pdFH showed increased DAA compared to pdFH alone as shown by the faster decrease in signal (**Fig.**  
285 **2A**, grey dashed line). The anti-FH Fab' fragments alone did not enhance DAA (**Fig. 2A**, black dashed  
286 line). Addition of FH binding Fab' (anti-FH.16) or blocking Fab' (anti-FH.09) (18) fragments results in  
287 respectively similar or less DAA compared to pdFH alone, confirming the potentiating effect of anti-  
288 FH.07.1 (**Fig. 2B**).

289 We then studied the potential of all tested FH mutants to accelerate the decay of the C3 convertase.  
290 All tested mutants did have DAA, although less efficient compared to WT FH (**Fig. 2C**, solid lines), and  
291 were all potentiated by addition of anti-FH.07.1 Fab' fragments (**Fig. 2C**, dashed lines). Small  
292 differential effects of each tested FH mutant is observed. Without potentiation, WT FH, W1183L and  
293 R1210C show the highest activity in the DAA assay followed by, V1197A and G1194D, as determined

294 by the final decrease in response. All tested FH mutants are similarly enhanced by the addition of  
295 anti-FH.07.1.

296 **The regulatory properties of most FH mutants can be enhanced by the potentiating anti-FH on**  
297 **cellular surfaces**

298 In the SPR-based C3b binding and DAA assays, only small differences were detected comparing each  
299 of the four tested FH mutants with WT FH, so the potential to potentiate these mutants with anti-  
300 FH.07.1 on human cell surfaces was investigated. A cellular assay employing human HAP-1 cells was  
301 utilized in which all the membrane bound complement regulatory proteins (CD46, CD55 and CD59;  
302 these cells are naturally deficient of complement receptor 1) were knocked out (21). These cells are  
303 highly susceptible to complement activation when incubated with NPS, as shown by the high amount  
304 of C3 deposition (**Fig. 3a and Supplemental Fig. 3**). In this assay, addition of pdFH to the NPS  
305 decreases the C3 deposition, showing extra regulation from the added pdFH (**Fig. 3A and 3B**).  
306 Addition of the potentiating anti-FH to the NPS enhances the regulatory function of the present FH  
307 and as a consequence also decreases C3 deposition. These results indicate that HAP-1 cells deficient  
308 of all membrane bound complement regulatory proteins are highly dependent on FH binding to  
309 regulate complement deposition on their surface. The effects of the mutant FH proteins were  
310 investigated in this model both in isolation and in combination with the potentiating anti-FH. **Fig. 3C**  
311 **and 3D** shows that addition of the WT FH improved the regulatory balance on the deficient HAP-1  
312 cells. None of the tested mutant FH variants was able to do so. Only a mild non-significant decrease  
313 in C3 deposition is observed compared to serum alone with addition of mutants V1197A, R1210C and  
314 G1194D (**Fig. 3C and 3D**, solid lines). Addition of anti-FH.07.1, which will bind to both serum FH from  
315 the NPS and the added recombinant FH, significantly increased regulation in all conditions (**Fig. 3C**  
316 **and 3D**, dashed lines).

317 To be able to fully distinguish the capacity of our antibodies to potentiate both WT as well as mutant  
318 FH, we further investigated complement activation on our HAP-1 cells deficient of complement  
319 regulators using FH depleted serum. We are unable to detect C3b deposition on the deficient HAP-1  
320 cells when using FH depleted serum alone (**Fig. 3E and 3F**). This is consistent with data of others (12,  
321 24, 25) and probably due to complete consumption of C3 in the FH depleted serum. Addition of  
322 physiological pdFH concentrations partly restores the C3 deposition to NPS control situation (**Fig. 3F**)  
323 as the fluid phase C3 conversion is also controlled. Addition of all FH mutants restores C3b deposition  
324 in this assay (**Fig. 3G**), indicating that all the tested mutant FH proteins restore the fluid phase  
325 regulation. **Fig. 3G** shows that FH V1197A, R1210C and G1194D restore C3b deposition equally well  
326 as pdFH, while addition of FH W1183L results in more C3b deposition. Addition of recombinant WT  
327 FH results in undetectable C3b deposition. We expect that addition of recombinant WT FH fully

328 regulates fluid-phase C3 tick-over and inhibits complement deposition on the surface at the same  
329 time as we (**Supplemental Fig. 4**) and others (23) have observed that recombinant FH results in FH  
330 with better regulatory capacities than pdFH.

331 Addition of anti-FH.07.1, now acting only on the recombinant FH as no endogenous FH is present,  
332 shows that regulation by all mutant FH molecules, except FH W1183L, are enhanced as shown by  
333 decreased C3b deposition on the cell surface compared to the mutants alone (**Fig. 3G**, dashed lines).  
334 To conclude, V1197A, R1210C and G1194D are able to regulate C3 deposition on complement  
335 regulator deficient HAP-1 cells and are potentiated, by addition of anti-FH.07.1.

### 336 **C3b deposition is differentially controlled by all FH variants**

337 To distinguish between the effects on fluid-phase and membrane regulation, we next investigated  
338 the impact of FH mutants on C3 regulation in serum, by assessing C3b deposition on LPS coated  
339 microtiter plates. To be able to solely assess the effect of our potentiating anti-FH on recombinant FH  
340 and not endogenous FH, this assay was performed using FH depleted serum. Similar to **Fig. 3E and**  
341 **3F**, without FH in this assay we observe no C3 deposition because of low C3 levels caused by the  
342 natural consumption of C3 due to the tick-over of C3 into C3(H<sub>2</sub>O) (12, 25). Addition of all four tested  
343 FH mutants in increasing concentrations to the FH depleted serum first restores fluid phase  
344 complement regulation, resulting in measurable C3b deposition on LPS coated plates for all proteins  
345 up to  $\leq 20$   $\mu\text{g/mL}$  supplemented FH (**Fig. 4A**). This is followed by surface regulation upon further  
346 increasing FH concentration, resulting in a decreased C3b deposition.

347 Enhanced fluid phase regulation by any of the tested FH mutants was not observed in the presence  
348 of anti-FH07.1. However, there was a positive effect on surface regulation with the addition of anti-  
349 FH.07.1. Less FH is needed to restore the surface regulation of the C3b deposition, and thus the  
350 antibody enhances the FHs' function (**Fig. 4A**, dashed lines). To conclude, V1197A, R1210C and  
351 G1194D are able to regulate C3 deposition on LPS in FH depleted serum alone and are potentiated,  
352 albeit differentially, by addition of the potentiating anti-FH.

### 353 **FH differentially regulate hemolysis in sheep erythrocyte hemolytic assay**

354 To investigate if the FH mutations affect surface regulation of C3 deposition on cells similar as shown  
355 in an ELISA based assay, we employed the sheep erythrocyte (SE) hemolytic assay (26) with minor  
356 modifications to use FH depleted serum. Similar to our ELISA based assay, supplementation of  
357 recombinant WT FH restores complement regulation of FH depleted serum as shown by lysis of the  
358 SE. With addition of higher amounts of FH no more lysis is observed (**Fig. 4B**), indicating full  
359 protection. In this assay, the WT FH was most potent, with lowest amount of FH needed to restore  
360 protection. Compared to WT FH, the four mutant FHs required a higher FH concentration to inhibit

361 lysis, indicating that the FH mutants are less potent in restoring complement regulation on the cell  
362 surface. Interestingly, anti-FH.07.1 increased the regulatory activity of all FH variants except W1183L,  
363 which was not able to regulate lysis even with addition of anti-FH.07.1. We only observe a reduction  
364 in lysis upon the highest, non-physiological, concentration. Overall, our data shows that anti-FH.07.1  
365 is able to enhance the regulatory capacity of aHUS associated FH mutants V1197A, R1210C and  
366 G1194D making this antibody an interesting drug candidate.

367

368 **Discussion**

369 We had shown previously that our potentiating anti-FH antibody, anti-FH.07 was able to restore the  
370 FH activity in serum of aHUS patients (18). We currently investigated the effect of the anti-FH  
371 agonistic antibody, anti-FH.07.1 on four aHUS associated mutant variants of FH. However, in aHUS,  
372 patients are often heterozygous for FH mutations and it was unknown whether the antibody  
373 potentiated mutated FH in addition to WT FH. We now clarified that for three of the four tested  
374 mutants the anti-FH.07.1 monoclonal antibody increases the functionality of FH. This indicates that in  
375 aHUS patients carrying these select FH mutants, both the WT and the mutated FH protein will be  
376 potentiated.

377 Using SPR we confirmed that anti-FH.07.1 was binding to the recombinant FHs with comparable  
378 affinities. The affinities were around ten times higher than pdFH binding (data not shown). This  
379 increased affinity could be caused by the HIS-tag on the FH, which is known to cause artefactual  
380 enhanced binding on CM5 sensors, as used in this SPR setup (27). In addition, the tested FH mutants  
381 showed slight decrease in affinity for C3b compared to WT FH. Previous studies have shown  
382 conflicting results towards the effect of studied mutation on binding to C3b. Reports have shown  
383 variable effects of the W1183L, R1210C and V1197A mutations resulting in reduced C3b binding.  
384 These studies include the use of patient derived material, or recombinant constructs comprising CCPs  
385 8-20 (FH8-20) or CCPs 18-20 (FH18-20) and the use of various assays (26, 28–31). Mutant G1194D has  
386 not been functionally studied before. The recombinant full length FH mutants used in this study are  
387 different than those used in previous studies and as a result, we cannot directly compare affinities.  
388 However, it seems that the involvement of CCPs 1-4, which contain an important C3 binding region  
389 (7, 11), in our full length FH dampens the effect on C3b binding as we see only a slight reduction in  
390 affinity (< 2-fold) between WT and four tested mutants which is in contrast to studies using FH8-20 or  
391 FH18-20 which see  $\leq 60\%$  reduction in affinity compared to the WT fragment (28–31). However, this  
392 does not explain the discrepancy between the results of Sanchez-Corral et. al and this study.  
393 Sanchez-Corral has isolated full length FH from healthy volunteers or patient material containing  
394 mutations W1183L, V1197A or R1210C (31). This studies indicates a  $\sim 4$ -fold reduction in affinity  
395 towards C3b while we observe only moderate reduction. As described before, our recombinant  
396 proteins contain a HIS-tag which might have influenced our SPR based assay (27). However, as our  
397 WT FH also contains this HIS tag it might also be the sample preparation or other causes that affect  
398 the functionality of these mutants.

399 The addition of anti-FH.07.1 increases the affinity of all mutants for C3b with affinities that approach  
400 the affinity of WT FH for C3b. Anti-FH.07.1, which binds to CCP-18 (18), might alter the C3b binding

401 interface of the C-terminal domains in such a way that CCP20 binding to the surface is less important.  
402 Possibly, the antibody affects the proposed “closed” or “folded” state of native FH (32, 33), allowing  
403 better binding to C3b. More research into the effect of our antibody on FH’s binding interaction with  
404 C3b and potential conformation changes are still needed to fully understand the mechanisms of  
405 action. Using the same C3b coupled SPR chip we observed very similar capacity for DAA of all FH  
406 mutants. As we have shown similar C3b affinity between mutants in our SPR based setup and co-  
407 factor activity relies on CCP domain 1-4 (7, 11) this data is in line with expectations. All four tested FH  
408 mutants are equally enhanced and only very small effects of the mutations are noticed.

409 The effects of the mutations are more pronounced in the experiments involving serum. Studies show  
410 that aHUS patients carrying the specific mutations used in this study (W1183L, R1210C, V1197A) do  
411 not present with consumption of complement (hypocomplementemia) (26, 30, 31). As mentioned  
412 above, it is known that CCPs 1-4 of factor H are responsible for co-factor activity and fluid phase  
413 regulation (7) and these domains are not affected in these FH mutants (26). Our study shows  
414 similar results, all our mutants are able to control fluid phase regulation. However, especially  
415 W1183L seems to be able to control of fluid phase regulation better than other FH mutants and even  
416 WT FH.

417 The results of complement regulation on the surface using an ELISA format were in agreement with  
418 the results of the hemolytic assay. Mutant W1183L was only able to regulate some C3 deposition  
419 upon FH potentiation, when added in supra-physiological concentration. R1210C performed in these  
420 assays equally well as WT FH did, while this mutant is known to have reduced affinity for C3b and  
421 cellular surfaces (28). The results were unexpected, because this mutation has been repeatedly found  
422 in aHUS, C3G, as well as AMD patients (34). An explanation could be that in patient material it was  
423 found that the introduced cysteine residue forms disulfide bond between FH and albumin, forming a  
424 210 KDa band in serum isolated FH (31). This phenotype can explain the cause of disease in patients,  
425 as the FH-HSA is functionally impaired and affects the ability of the patient serum to protect against  
426 SE lysis (31), and similar protein interactions with other proteins have not been identified to occur  
427 during the production of the recombinant mutant protein.

428 For all mutants, except G1194D, it has been shown that CCP8-20 fragments are affected in their  
429 capacity to bind to heparin or human umbilical vein endothelial cells (HUVEC) (28, 30), as well as the  
430 reduced ability of patient serum or recombinant FH fragments to respectively protect against or  
431 inhibit SE lysis (31, 35). This is in line with our own observations, except for R1210C, which performed  
432 equal to WT FH in our hemolytic assay. W1183L seems much less potent in controlling complement  
433 regulation on surfaces compared to the other mutants. Considering the function of studied



434 mutations, other studies are not always in agreement. While one structural study of the FH18-20  
435 fragment shows that the W1183 domain in CCP20 is directly involved in C3b/d binding (29), other  
436 studies demonstrate the close involvement of W1183 in binding to sialic acid (36). Mutations  
437 R1210C, V1197A and G1194D result in destabilization of the tertiary structure (29), while V1197 is  
438 also shown to be important for binding to sialic acid (36). However, it is also noted that other ligands  
439 might have differential interactions in this binding region, such as heparin sulphates compared to  
440 sialic acid (36, 37) and is explained by the various effector functions of FH on different cells types,  
441 such as endothelial cells, glomerular membrane, retinal pigment epithelium, Bruch's membrane in  
442 the eye, platelets or erythrocytes (24, 37, 38). A dual interaction of FH to C3b and sialic acid residues  
443 is crucial for protection of cells against unwanted complement activation on human cell surfaces (38).  
444 W1183 is involved in both processes and it has been shown that in competition assays, the patient-  
445 associated W1183L aHUS mutation mostly affects the ability to compete with WT FH (38, 39). In  
446 these studies, Hyvärinen et al. show that removal of sialic acid from HUVECs and platelets showed  
447 minimal effect on the competition of this FH mutant FH18-20 compared to WT FH18-20 with WT FH,  
448 showing that the sialic acid was crucial for this interaction (38).

449 In conclusion, we have shown that four select recombinantly expressed aHUS associated FH mutant  
450 proteins can be enhanced in their binding to C3b and decay accelerating activity by our potentiating  
451 antibody. In addition, this anti-FH antibody can potentiate three of the four FH mutants in their  
452 regulatory function on the cellular surface. Taken together, this research confirms that our antibody  
453 can potentially be used to enhance the FH of aHUS patients who carry these mutations.

## 454 **Acknowledgments**

455 We thank Arnoud Marquart, Richard Pouw and Christoph Schmidt for their kind help with methods  
456 and the analysis of data. We thank Dr. Erfan Nur for his kind help obtaining Eculizumab.

457

458 **References**

- 459 1. Merle, N. S., S. E. Church, V. Fremeaux-Bacchi, and L. T. Roumenina. 2015. Complement System  
460 Part I - Molecular Mechanisms of Activation and Regulation. *Front. Immunol.* 6: 262.
- 461 2. Ricklin, D., G. Hajishengallis, K. Yang, and J. D. Lambris. 2010. Complement: a key system for  
462 immune surveillance and homeostasis. *Nat. Immunol.* 11: 785–97.
- 463 3. Le Friec, G., G. Le Friec, and C. Kemper. 2009. Complement: coming full circle. *Arch. Immunol. Ther.*  
464 *Exp. (Warsz).* 57: 393–407.
- 465 4. Thurman, J. M., and V. M. Holers. 2006. The central role of the alternative complement pathway in  
466 human disease. *J. Immunol.* 176: 1305–10.
- 467 5. Łukawska, E., M. Polcyn-Adamczak, and Z. I. Niemir. 2018. The role of the alternative pathway of  
468 complement activation in glomerular diseases. *Clin. Exp. Med.* 18: 297–318.
- 469 6. Noris, M., and G. Remuzzi. 2013. Overview of complement activation and regulation. *Semin.*  
470 *Nephrol.* 33: 479–92.
- 471 7. Ferreira, V. P., M. K. Pangburn, and C. Cortés. 2010. Complement control protein factor H: The  
472 good, the bad, and the inadequate. *Mol. Immunol.* 47: 2187–97.
- 473 8. Jokiranta, T. S., J. Hellwage, V. Koistinen, P. F. Zipfel, and S. Meri. 2000. Each of the three binding  
474 sites on complement factor H interacts with a distinct site on C3b. *J. Biol. Chem.* 275: 27657–62.
- 475 9. Rodríguez de Córdoba, S., J. Esparza-Gordillo, E. Goicoechea de Jorge, M. Lopez-Trascasa, and P.  
476 Sánchez-Corral. 2004. The human complement factor H: functional roles, genetic variations and  
477 disease associations. *Mol. Immunol.* 41: 355–67.
- 478 10. Meri, S., and M. K. Pangburn. 1990. Discrimination between activators and nonactivators of the  
479 alternative pathway of complement: regulation via a sialic acid/polyanion binding site on factor H.  
480 *Proc. Natl. Acad. Sci. U. S. A.* 87: 3982–6.
- 481 11. Schmidt, C. Q., A. P. Herbert, D. Kavanagh, C. Gandy, C. J. Fenton, B. S. Blaum, M. Lyon, D. Uhrin,  
482 and P. N. Barlow. 2008. A New Map of Glycosaminoglycan and C3b Binding Sites on Factor H. *J.*  
483 *Immunol.* 181: 2610–2619.
- 484 12. Pangburn, M. K. 2002. Cutting edge: localization of the host recognition functions of complement  
485 factor H at the carboxyl-terminal: implications for hemolytic uremic syndrome. *J. Immunol.* 169:  
486 4702–6.
- 487 13. Nester, C. M., T. Barbour, S. R. de Cordoba, M.-A. Dragon-Durey, V. Fremeaux-Bacchi, T. H. J.  
488 Goodship, D. Kavanagh, M. Noris, M. C. Pickering, P. Sánchez-Corral, C. Skerka, P. F. Zipfel, and R. J. H.  
489 Smith. 2015. Atypical aHUS: State of the art. *Mol. Immunol.* 67: 31–42.
- 490 14. Bresin, E., E. Rurali, J. Caprioli, P. Sánchez-Corral, V. Fremeaux-Bacchi, S. R. de Cordoba, S. Pinto,  
491 T. H. J. Goodship, M. Alberti, D. Ribes, E. Valoti, G. Remuzzi, and M. Noris. 2013. Combined  
492 complement gene mutations in atypical hemolytic uremic syndrome influence clinical phenotype. *J.*  
493 *Am. Soc. Nephrol.* 24: 475–486.
- 494 15. Dragon-Durey, M.-A., V. Frémeaux-Bacchi, C. Loirat, J. Blouin, P. Niaudet, G. Deschenes, P. Coppo,  
495 W. Herman Fridman, and L. Weiss. 2004. Heterozygous and homozygous factor h deficiencies  
496 associated with hemolytic uremic syndrome or membranoproliferative glomerulonephritis: report  
497 and genetic analysis of 16 cases. *J. Am. Soc. Nephrol.* 15: 787–95.
- 498 16. de Cordoba, S. R., A. Tortajada, C. L. Harris, and B. P. Morgan. 2012. Complement dysregulation

- 499 and disease: From genes and proteins to diagnostics and drugs. *Immunobiology* 217: 1034–1046.
- 500 17. Kavanagh, D., T. H. Goodship, and A. Richards. 2013. Atypical hemolytic uremic syndrome. *Semin.*  
501 *Nephrol.* 33: 508–30.
- 502 18. Pouw, R. B., M. C. Brouwer, M. de Gast, A. E. van Beek, L. P. van den Heuvel, C. Q. Schmidt, A. van  
503 der Ende, P. Sánchez-Corral, T. W. Kuijpers, and D. Wouters. 2019. Potentiation of complement  
504 regulator factor H protects human endothelial cells from complement attack in aHUS sera. *Blood*  
505 *Adv.* 3: 621–632.
- 506 19. Kasanmoentalib, E. S., M. Valls Serón, J. Y. Engelen-Lee, M. W. Tanck, R. B. Pouw, G. van Mierlo,  
507 D. Wouters, M. C. Pickering, A. van der Ende, T. W. Kuijpers, M. C. Brouwer, and D. van de Beek.  
508 2019. Complement factor H contributes to mortality in humans and mice with bacterial meningitis. *J.*  
509 *Neuroinflammation* 16: 279.
- 510 20. Hack, C. E., J. Paardekooper, R. J. Smeenk, R. J. M. Abbott, a J. Eerenberg, and J. H. Nuijens. 1988.  
511 Disruption of the internal thioester bond in the third component of complement (C3) results in the  
512 exposure of neodeterminants also present on activation products of C3. An analysis with monoclonal  
513 antibodies. *J. Immunol.* 141: 1602–9.
- 514 21. Thielen, A. J. F., I. M. van Baarsen, M. L. Jongsma, S. S. Zeerleder, R. M. Spaapen, and D. Wouters.  
515 2018. CRISPR/Cas9 generated human CD46, CD55 and CD59 knockout cell lines as a tool for  
516 complement research. *J. Immunol. Methods* 456: 15–22.
- 517 22. Essletzbichler, P., T. Konopka, F. Santoro, D. Chen, B. V. Gapp, R. Kralovics, T. R. Brummelkamp, S.  
518 M. B. Nijman, and T. Bürckstümmer. 2014. Megabase-scale deletion using CRISPR/Cas9 to generate a  
519 fully haploid human cell line. *Genome Res.* 24: 2059–65.
- 520 23. Schmidt, C. Q., F. C. Slingsby, A. Richards, and P. N. Barlow. 2011. Production of biologically active  
521 complement factor H in therapeutically useful quantities. *Protein Expr. Purif.* 76: 254–63.
- 522 24. Dopler, A., L. Guntau, M. J. Harder, A. Palmer, B. Höchsmann, H. Schrezenmeier, T. Simmet, M.  
523 Huber-Lang, and C. Q. Schmidt. 2019. Self versus Nonself Discrimination by the Soluble Complement  
524 Regulators Factor H and FHL-1. *J. Immunol.* j1801545.
- 525 25. Pickering, M. C., H. T. Cook, J. Warren, A. E. Bygrave, J. Moss, M. J. Walport, and M. Botto. 2002.  
526 Uncontrolled C3 activation causes membranoproliferative glomerulonephritis in mice deficient in  
527 complement factor H. *Nat. Genet.* 31: 424–8.
- 528 26. Sánchez-Corral, P., C. González-Rubio, S. Rodríguez de Córdoba, and M. López-Trascasa. 2004.  
529 Functional analysis in serum from atypical Hemolytic Uremic Syndrome patients reveals impaired  
530 protection of host cells associated with mutations in factor H. *Mol. Immunol.* 41: 81–4.
- 531 27. Drescher, D. G., D. Selvakumar, and M. J. Drescher. 2018. Analysis of Protein Interactions by  
532 Surface Plasmon Resonance. *Adv. Protein Chem. Struct. Biol.* 110: 1–30.
- 533 28. Józsi, M., S. Heinen, A. Hartmann, C. W. Ostrowicz, S. Hälbich, H. Richter, A. Kunert, C. Licht, R. E.  
534 Saunders, S. J. Perkins, P. F. Zipfel, and C. Skerka. 2006. Factor H and atypical hemolytic uremic  
535 syndrome: mutations in the C-terminus cause structural changes and defective recognition functions.  
536 *J. Am. Soc. Nephrol.* 17: 170–7.
- 537 29. Jokiranta, T. S., V.-P. Jaakola, M. J. Lehtinen, M. Pärevalo, S. Meri, and A. Goldman. 2006.  
538 Structure of complement factor H carboxyl-terminus reveals molecular basis of atypical haemolytic  
539 uremic syndrome. *EMBO J.* 25: 1784–94.
- 540 30. Manuelian, T., J. Hellwage, S. Meri, J. Caprioli, M. Noris, S. Heinen, M. Jozsi, H. P. H. H. Neumann,  
541 G. Remuzzi, and P. F. Zipfel. 2003. Mutations in factor H reduce binding affinity to C3b and heparin

- 542 and surface attachment to endothelial cells in hemolytic uremic syndrome. *J. Clin. Invest.* 111: 1181–  
543 90.
- 544 31. Sánchez-Corral, P., D. Pérez-Caballero, O. Huarte, A. M. Simckes, E. Goicoechea, M. López-  
545 Trascasa, and S. R. de Cordoba. 2002. Structural and functional characterization of factor H mutations  
546 associated with atypical hemolytic uremic syndrome. *Am. J. Hum. Genet.* 71: 1285–95.
- 547 32. Schmidt, C. Q., J. D. Lambris, and D. Ricklin. 2016. Protection of host cells by complement  
548 regulators. *Immunol. Rev.* 274: 152–171.
- 549 33. Oppermann, M., T. Manuelian, M. Józsi, E. Brandt, T. S. Jokiranta, S. Heinen, S. Meri, C. Skerka, O.  
550 Götze, and P. F. Zipfel. 2006. The C-terminus of complement regulator Factor H mediates target  
551 recognition: evidence for a compact conformation of the native protein. *Clin. Exp. Immunol.* 144:  
552 342–52.
- 553 34. Martinez-Barricarte, R., G. Pianetti, R. Gautard, J. Misselwitz, L. Strain, V. Fremeaux-Bacchi, C.  
554 Skerka, P. F. Zipfel, T. Goodship, M. Noris, G. Remuzzi, S. R. de Cordoba, and European Working Party  
555 on the Genetics of HUS. 2008. The complement factor H R1210C mutation is associated with atypical  
556 hemolytic uremic syndrome. *J. Am. Soc. Nephrol.* 19: 639–46.
- 557 35. Ferreira, V. P., A. P. Herbert, C. Cortés, K. A. McKee, B. S. Blaum, S. T. Esswein, D. Uhrín, P. N.  
558 Barlow, M. K. Pangburn, and D. Kavanagh. 2009. The binding of factor H to a complex of physiological  
559 polyanions and C3b on cells is impaired in atypical hemolytic uremic syndrome. *J. Immunol.* 182:  
560 7009–18.
- 561 36. Blaum, B. S., J. P. Hannan, A. P. Herbert, D. Kavanagh, D. Uhrín, and T. Stehle. 2015. Structural  
562 basis for sialic acid-mediated self-recognition by complement factor H. *Nat. Chem. Biol.* 11: 77–82.
- 563 37. Clark, S. J., L. A. Ridge, A. P. Herbert, S. Hakobyan, B. Mulloy, R. Lennon, R. Würzner, B. P. Morgan,  
564 D. Uhrín, P. N. Bishop, and A. J. Day. 2013. Tissue-specific host recognition by complement factor H is  
565 mediated by differential activities of its glycosaminoglycan-binding regions. *J. Immunol.* 190: 2049–  
566 57.
- 567 38. Hyvärinen, S., S. Meri, and T. S. Jokiranta. 2016. Disturbed sialic acid recognition on endothelial  
568 cells and platelets in complement attack causes atypical hemolytic uremic syndrome. *Blood* 127:  
569 2701–2710.
- 570 39. Blatt, A. Z., G. Saggu, C. Cortes, A. P. Herbert, D. Kavanagh, D. Ricklin, J. D. Lambris, and V. P.  
571 Ferreira. 2017. Factor H C-Terminal Domains Are Critical for Regulation of Platelet/Granulocyte  
572 Aggregate Formation. *Front. Immunol.* 8: 1586.
- 573

574 **Figure legends**

575 **Figure 1: Affinity for C3b of mutant FHs is conserved and enhanced by potentiating antibody**

576 The affinity of FH for C3b was measured using SPR. Measurements were performed on the Biacore  
577 T200 with CM5 chip coupled with ~2000 RU C3b. (A) Sensorgrams of in house purified plasma  
578 derived FH (pdFH) binding to C3b. pdFH was titrated from 10 or 5  $\mu$ M respectively, in 2 fold dilutions  
579 and flown over the chip without (left) or with (right) the presence of an excess (10  $\mu$ M, at least 2 fold  
580 based on molar concentration) of anti-FH.07.1 Fab' fragments. Sensorgrams were corrected for  
581 molecule size (155 KDa FH alone, 205 KDa FH + potentiating Fab' fragment), and show an increased  
582 response upon addition of the anti-FH.07.1 Fab' fragment. (B) Affinity curves, based on average  
583 response at equilibrium binding ( $\Delta$ T 50-55 sec) in Fig. A, show an increase in binding upon addition of  
584 anti-FH.07.1 as presented by the estimated affinity  $K_D$  of 6.0 and 1.9  $\mu$ M for pdFH alone or with  
585 addition of the anti-FH.07.1 Fab' fragments respectively. (C) Affinity curves based on 2-fold titrations  
586 (625 – 39.0625 nM) of recombinant WT and mutant FH, corrected for molecule size, as described  
587 above, showing an increased response upon addition the anti-FH.07.1 Fab' fragment (1.25  $\mu$ M,  
588 dashed lines). Experiments are performed in two sets due to instrumental limitations. Figures are  
589 representative of n=2.

590 **Figure 2: DAA of mutant FHs is enhanced by potentiating anti-FH**

591 (A) In a SPR based setup FB and FD were flown over a sensor chip which was amine-coupled with  
592 ~2000RU C3b to form C3bBb (convertase) complexes (phase I). Subsequently, a decline in signal  
593 indicated natural decay of the convertase as Bb is released from the coupled C3b (phase II). Injection  
594 of pdFH (50nM) causes accelerated decay (grey, solid line), as observed by a sudden further drop in  
595 response (phase III). The addition of the anti-FH.07.1 Fab' fragment (200nM) to pdFH increases DAA  
596 of pdFH (grey, dashed line), whilst the Fab' fragment alone does not affect the natural decay (black,  
597 dashed line). (B) With similar setup as described above, addition of anti-FH.07.1, FH blocking (anti-  
598 FH.09, (18)) or binding (anti-FH.16, (18)) anti-FH Fab' fragments respectively increase, decrease or do  
599 not affect DAA of pdFH. (C) Injection of recombinant WT or FH mutants (12.5 nM) shows DAA.  
600 Addition of the anti-FH.07.1 Fab' fragment (100nM) increases the DAA of all FHs. Enlargement of the  
601 DAA segment of SPR shows slight differences in DAA are observed between FH mutants. Addition of  
602 the anti-FH.07.1 Fab' fragment (dashed lines) improves the DAA of all FH. Figures are average of  
603 duplicate runs and representative of n=8 (A), n=1 (B) or n=3 (C).

604 **Figure 3: Deficient HAP-1 cells are protected by additional FH**

605 (A) Flow cytometry analysis shows that HAP-1 cells deficient of all membrane bound complement  
606 regulators are sensitive to complement activation from NPS (25%) as shown by C3b deposition

607 (black, solid line). Addition of the anti-FH.07.1 (75  $\mu\text{g}/\text{mL}$ , grey line) or additional of pdFH (32.5  
608  $\mu\text{g}/\text{mL}$ , black, dashed line) shows control of C3 deposition. Histograms are a representative of  $n=4$ .  
609 (B) Normalized average MFI of conditions shown in Fig. A ( $n=4$ ). (C) Addition of the recombinant WT  
610 or FH mutants (32.5  $\mu\text{g}/\text{mL}$ , solid lines) show an increase in complement regulation on the HAP-1  
611 cells deficient of membrane bound regulators as noted by a decreased C3 deposition compared to  
612 serum alone (grey, filled) and is further enhanced by the addition the anti-FH.07.1 (75  $\mu\text{g}/\text{mL}$ , dashed  
613 lines). Histograms are a representative of  $n=4$ . (D) Normalized average MFI of conditions shown in  
614 Fig. C ( $n=4$ ). (E) The addition of FH depleted serum (25%, black line) to deficient HAP-1 cells does not  
615 lead to C3b deposition as C3 is consumed in fluid phase in this serum before it can be deposited on  
616 the cells (25). Addition of pdFH (grey, dashed line) protects the fluid phase C3 consumption and thus  
617 renders the cells sensitive for complement activation as shown by increased C3b deposition.  
618 Histograms are a representative of  $n=3$ . (F) Normalized average MFI of conditions shown in Fig. E  
619 ( $n=3$ ). (G) Addition of the recombinant WT or FH mutants (75  $\mu\text{g}/\text{mL}$ , solid lines) to the FH depleted  
620 serum (25%) shows an increase in C3 deposition on the deficient HAP-1 compared to FH depleted  
621 serum alone (grey, filled), following the restoration of the regulation of fluid phase C3 consumption.  
622 Addition of the anti-FH.07.1 (75  $\mu\text{g}/\text{mL}$ , dashed lines) next shows a decrease in C3 deposition  
623 compared to FH depleted serum and FH alone in flow cytometry. Histograms are a representative of  
624  $n=3$ . Error bars represent standard deviation, \*  $p < 0.1$ , \*\*  $p < 0.01$ , \*\*\*  $p < 0.001$ , analyzed by one-  
625 way ANOVA and Tukey's multiple comparisons test.

#### 626 **Figure 4: C3b deposition and hemolysis are differentially controlled by FH mutants**

627 (A) LPS induced C3b deposition using FH depleted serum supplemented with either WT or FH  
628 mutants (solid lines) shows a concentration dependent increase in C3 deposition, indicating fluid  
629 phase regulation, followed by a decrease in C3b deposition, indicating surface regulation. Addition of  
630 the anti-FH.07.1 antibody (dashed lines) increases the regulatory activity of the most of the FH  
631 proteins. (B) Complement mediated lysis of SE incubated with FH depleted serum supplemented with  
632 either WT or FH mutants. Lysis is reduced by most of the FH proteins (solid lines). Addition of the  
633 anti-FH.07.1 antibody (dashed lines) improves the regulatory capacity of most of the FH proteins. The  
634 inhibition was fitted using a nonlinear fit, insufficient fit is not shown, instead the measured points  
635 are shown. Error bars represent standard deviation of experiments performed in duplicate and  
636 figures are representative of  $n=3$ .

#### 637 **Supplemental Figure 1: Recombinantly produced FHs are pure**

638 Expression and isolation of FH resulted in pure, full-length FH. No contamination or breakdown  
639 products are detected in the recombinant FH fractions as shown by SDS page with coomassie blue  
640 staining.

641 **Supplemental Figure 2: The anti-FH.07.1 is comparable to anti-FH.07**

642 (A) Anti-FH.07 (18) and anti.FH.07.1 (potentiating anti-FH, this research) share the same binding  
643 epitope on FH, as shown by competition ELISA. Either anti-FH.07, anti-FH.07.1, or a non-competing  
644 anti-FH (anti-FH.16, (18)) is coated as a capture of biotinylated FH. All abovementioned anti-FH  
645 antibodies are also included as a competitor for binding of biotinylated FH, plus a non-competing  
646 control isotype control (IgG control) (B) The anti-FH.07.1 is comparable in function to anti-FH.07 as  
647 shown by the inhibition of LPS activated C3b deposition in NPS. Error bars represent standard  
648 deviation of experiments performed in duplicate and figures are representative of n=2 and n=4 for  
649 respectively Fig. A and Fig B.

650 **Supplemental Figure 3: Gating strategy to determine level of C3b deposition on deficient HAP-1**  
651 **cells**

652 C3 deposition on HAP-1 cells deficient of all membrane bound complement regulators (Hap-1 KO  
653 CD46/CD55/CD59, (21)) incubated without (top panel) or with NPS (25%, bottom panel) was  
654 analyzed by flow cytometry using FITC or APC labeled anti-C3d (C3-19). Gating strategy was as  
655 followed: Deficient HAP-1 cells were gated based on size and granularity using FSC-A vs SSC-A to  
656 eliminate debris and clumped cells (plot 1). Single cells were sub-gated using SSC-H and SSC-W (plot  
657 2) and subsequent FSC-H and FSC-W (plot 3), Continuity of measurement was checked by plotting the  
658 acquisition time (x-axis) to the APC-A signal, "time-gate" (plot 4), Cells positive for C3b were  
659 visualized using normalized histograms of either FITC-A or APC-A, "C3b deposition" (plot 5). SSC-A:  
660 side scatter area, FSC-A: forward scatter area, FSC-H: forward scatter height, FSC-W: forward scatter  
661 width, SSC-H: side scatter height, SSC-W: side scatter width.

662 **Supplemental Figure 4: Recombinant WT FH has improved protective function in hemolytic assay**  
663 **compared to pdFH**

664 Recombinant WT FH has a higher regulatory potential as shown by complement mediated lysis of SE  
665 incubated with FH depleted serum supplemented with either pdFH or recombinant WT FH. Lysis is  
666 reduced by addition of FH, less recombinant WT FH is needed to reach inhibit lysis compared to  
667 pdFH. The inhibition was fitted using a nonlinear fit. Error bars represent standard deviation,  
668 experiments were performed in duplicate and figures are representative of n=3.

669 **Tables**

670 **Table I: Estimated affinity of recombinant FH for C3b with and without addition of anti-FH.07.1**

671 **Fab' fragments**

| FH variant | $K_D$ ( $M^{-1}$ ), FH only * | $K_D$ ( $M^{-1}$ ), FH + pot anti-FH Fab' * | Fold change** | n |
|------------|-------------------------------|---------------------------------------------|---------------|---|
| WT FH      | $3.0 \times 10^{-6} \pm 2.0$  | $1.7 \times 10^{-6} \pm 1.2$                | $1.8 \pm 0.1$ | 4 |
| W1183L     | $4.6 \times 10^{-6} \pm 2.5$  | $2.1 \times 10^{-6} \pm 1.1$                | $2.3 \pm 0.0$ | 2 |
| V1197A     | $5.0 \times 10^{-6} \pm 2.9$  | $2.2 \times 10^{-6} \pm 1.1$                | $2.2 \pm 0.2$ | 2 |
| R1210C     | $4.9 \times 10^{-6} \pm 3.0$  | $2.1 \times 10^{-6} \pm 1.4$                | $2.4 \pm 0.1$ | 2 |
| G1194D     | $4.7 \times 10^{-6} \pm 2.1$  | $2.4 \times 10^{-6} \pm 1.4$                | $2.1 \pm 0.3$ | 2 |

672 \* affinities are estimates as experimental setup could not reach the required higher concentrations

673 \*\* improved affinity of FH + anti-FH.07.1 Fab' fragments over FH alone



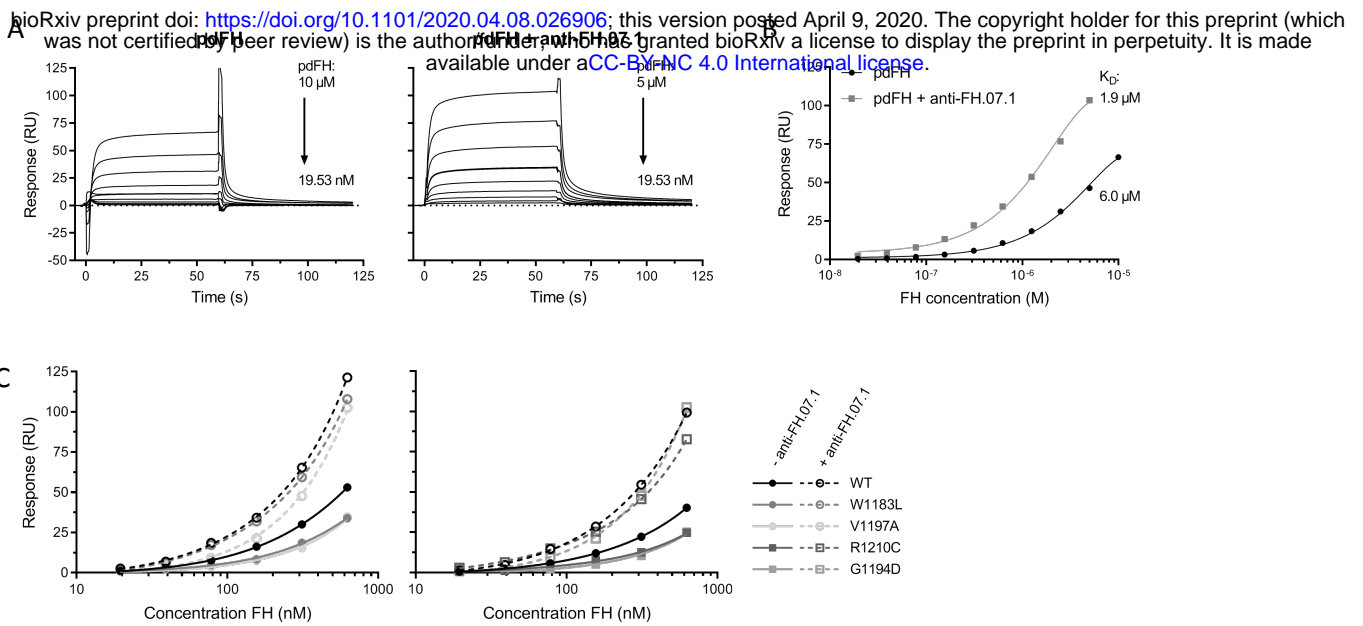

### Figure 1: Affinity for C3b of mutant FHs is conserved and enhanced by potentiating antibody

The affinity of FH for C3b was measured using SPR. Measurements were performed on the Biacore T200 with CM5 chip coupled with  $\sim 2000$  RU C3b. (A) Sensorgrams of in house purified plasma derived FH (pdFH) binding to C3b. pdFH was titrated from 10 or 5  $\mu\text{M}$  respectively, in 2 fold dilutions and flown over the chip without (left) or with (right) the presence of an excess (10  $\mu\text{M}$ , at least 2 fold based on molar concentration) of anti-FH.07.1 Fab' fragments. Sensorgrams were corrected for molecule size (155 KDa FH alone, 205 KDa FH + potentiating Fab' fragment), and show an increased response upon addition of the anti-FH.07.1 Fab' fragment. (B) Affinity curves, based on average response at equilibrium binding ( $\Delta T$  50-55 sec) in Fig. A, show an increase in binding upon addition of anti-FH.07.1 as presented by the estimated affinity  $K_D$  of 6.0 and 1.9  $\mu\text{M}$  for pdFH alone or with addition of the anti-FH.07.1 Fab' fragments respectively. (C) Affinity curves based on 2-fold titrations (625 – 39.0625 nM) of recombinant WT and mutant FH, corrected for molecule size, as described above, showing an increased response upon addition the anti-FH.07.1 Fab' fragment (1.25  $\mu\text{M}$ , dashed lines). Experiments are performed in two sets due to instrumental limitations. Figures are representative of  $n=2$ .

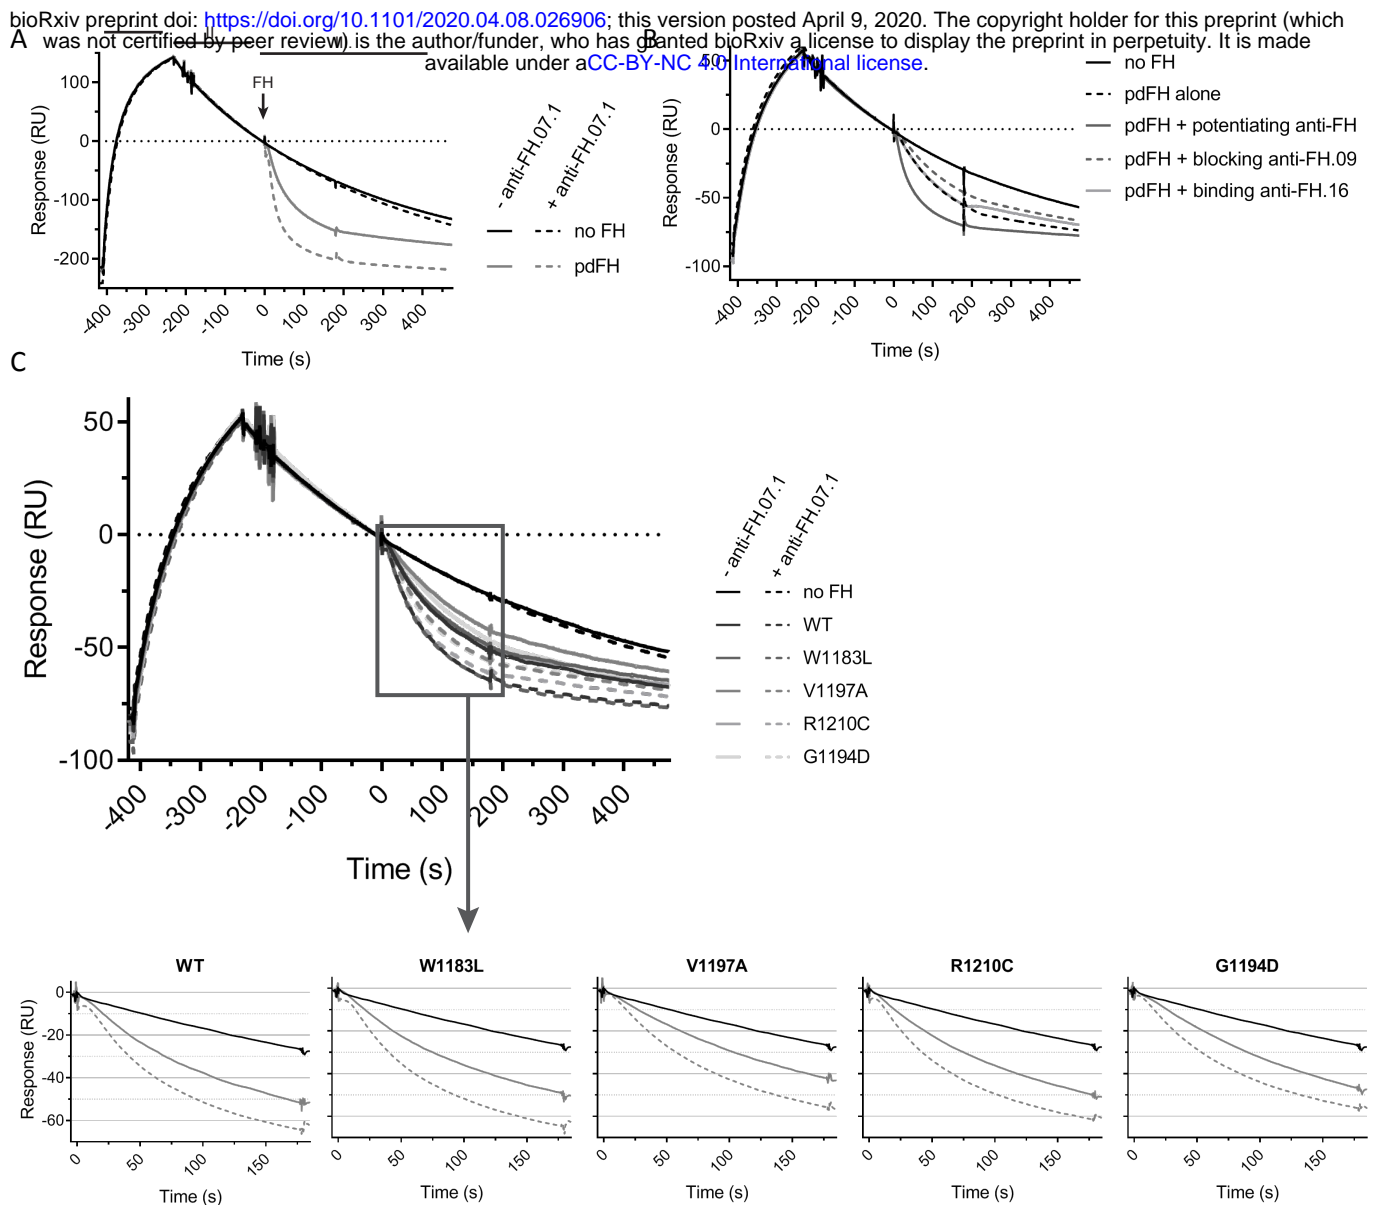

**Figure 2: DAA of mutant FHs is enhanced by potentiating anti-FH**

(A) In a SPR based setup FB and FD were flown over a sensor chip which was amine-coupled with ~2000RU C3b to form C3bBb (convertase) complexes (phase I). Subsequently, a decline in signal indicated natural decay of the convertase as Bb is released from the coupled C3b (phase II). Injection of pdFH (50nM) causes accelerated decay (grey, solid line), as observed by a sudden further drop in response (phase III). The addition of the anti-FH.07.1 Fab' fragment (200nM) to pdFH increases DAA of pdFH (grey, dashed line), whilst the Fab' fragment alone does not affect the natural decay (black, dashed line). (B) With similar setup as described above, addition of anti-FH.07.1, FH blocking (anti-FH.09, (18)) or binding (anti-FH.16, (18)) anti-FH Fab' fragments respectively increase, decrease or do not affect DAA of pdFH. (C) Injection of recombinant WT or FH mutants (12.5 nM) shows DAA. Addition of the anti-FH.07.1 Fab' fragment (100nM) increases the DAA of all FHs. Enlargement of the DAA segment of SPR shows slight differences in DAA are observed between FH mutants. Addition of the anti-FH.07.1 Fab' fragment (dashed lines) improves the DAA of all FH. Figures are average of duplicate runs and representative of n=8 (A), n=1 (B) or n=3 (C).



### Figure 3. Deficient HAP-1 cells are protected by additional FH

(A) Flow cytometry analysis shows that HAP-1 cells deficient of all membrane bound complement regulators are sensitive to complement activation from NPS (25%) as shown by C3b deposition (black, solid line). Addition of the anti-FH.07.1 (75  $\mu\text{g}/\text{mL}$ , grey line) or additional of pdFH (32.5  $\mu\text{g}/\text{mL}$ , black, dashed line) shows control of C3 deposition. Histograms are a representative of n=4. (B) Normalized average MFI of conditions shown in Fig. A (n=4). (C) Addition of the recombinant WT or FH mutants (32.5  $\mu\text{g}/\text{mL}$ , solid lines) show an increase in complement regulation on the HAP-1 cells deficient of membrane bound regulators as noted by a decreased C3 deposition compared to serum alone (grey, filled) and is further enhanced by the addition the anti-FH.07.1 (75  $\mu\text{g}/\text{mL}$ , dashed lines). Histograms are a representative of n=4. (D) Normalized average MFI of conditions shown in Fig. C (n=4). (E) The addition of FH depleted serum (25%, black line) to deficient HAP-1 cells does not lead to C3b deposition as C3 is consumed in fluid phase in this serum before it can be deposited on the cells (25). Addition of pdFH (grey, dashed line) protects the fluid phase C3 consumption and thus renders the cells sensitive for complement activation as shown by increased C3b deposition. Histograms are a representative of n=3. (F) Normalized average MFI of conditions shown in Fig. E (n=3). (G) Addition of the recombinant WT or FH mutants (75  $\mu\text{g}/\text{mL}$ , solid lines) to the FH depleted serum (25%) shows an increase in C3 deposition on the deficient HAP-1 compared to FH depleted serum alone (grey, filled), following the restoration of the regulation of fluid phase C3 consumption. Addition of the anti-FH.07.1 (75  $\mu\text{g}/\text{mL}$ , dashed lines) next shows a decrease in C3 deposition compared to FH depleted serum and FH alone in flow cytometry. Histograms are a representative of n=3. Error bars represent standard deviation, \*  $p < 0.1$ , \*\*  $p < 0.01$ , \*\*\*  $p < 0.001$ , analyzed by one-way ANOVA and Tukey's multiple comparisons test.

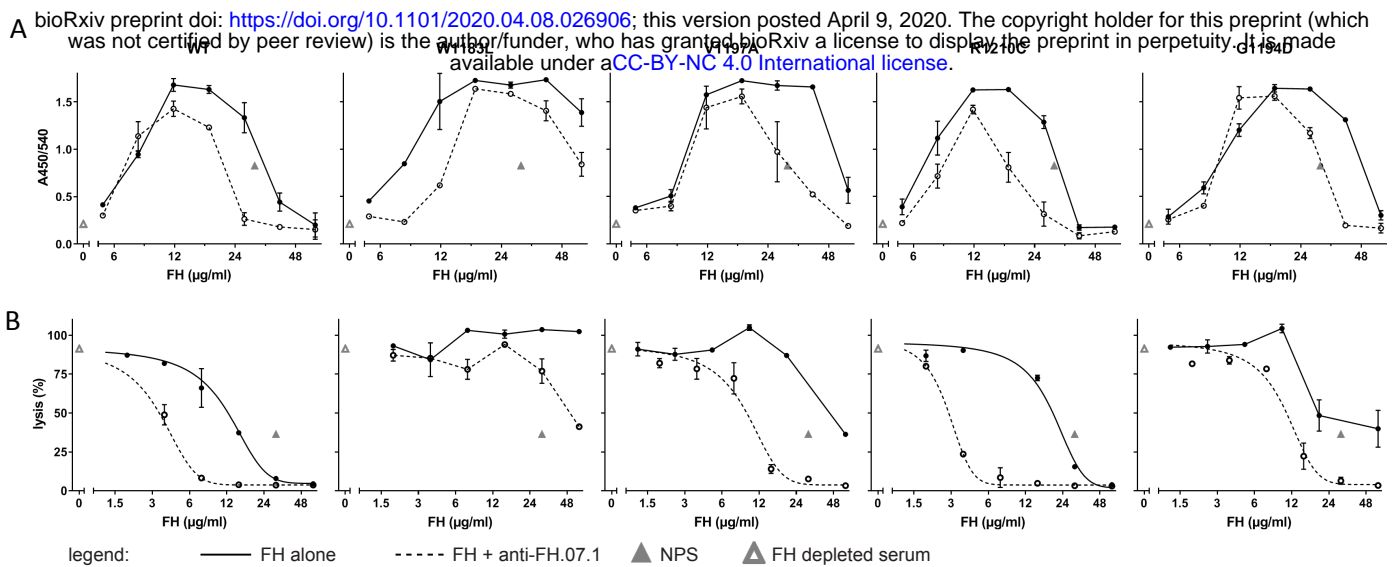

**Figure 4: C3b deposition and hemolysis are differentially controlled by FH mutants**

(A) LPS induced C3b deposition using FH depleted serum supplemented with either WT or FH mutants (solid lines) shows a concentration dependent increase in C3 deposition, indicating fluid phase regulation, followed by a decrease in C3b deposition, indicating surface regulation. Addition of the anti-FH.07.1 antibody (dashed lines) increases the regulatory activity of the most of the FH proteins.

(B) Complement mediated lysis of SE incubated with FH depleted serum supplemented with either WT or FH mutants. Lysis is reduced by most of the FH proteins (solid lines). Addition of the anti-FH.07.1 antibody (dashed lines) improves the regulatory capacity of most of the FH proteins. The inhibition was fitted using a nonlinear fit, insufficient fit is not shown, instead the measured points are shown. Error bars represent standard deviation of experiments performed in duplicate and figures are representative of n=3.
